# Supplementary material
Source: PubMed Central journal article supplement (PMC6648773)
Supplement: ao9b00185_si_001.pdf [file ao9b00185_si_001.pdf]

# Supporting Information for

## **Graphene liquid cell electron microscopy of initial lithiation in $\text{Co}_3\text{O}_4$ nanoparticles**

Joon Ha Chang,<sup>1,‡</sup> Jun Young Cheong,<sup>1,‡</sup> Sung Joo Kim,<sup>1</sup> Yoon-Su Shim,<sup>1</sup> Jae Yeol Park,<sup>1</sup>  
Hyeon Kook Seo,<sup>1</sup> Kyun Seong Dae,<sup>1</sup> Chan-Woo Lee,<sup>2</sup> Il-Doo Kim,<sup>1,\*</sup> Jong Min Yuk<sup>1,\*</sup>

<sup>1</sup> Department of Materials Science and Engineering, Korea Advanced Institute of Science and Technology, 335 Science Road, Daejeon 34141, Republic of Korea

<sup>2</sup> Platform Technology Laboratory, Korea Institute of Energy Research, 152 Gajeong-Ro, Yuseong-Gu, Daejeon 34129, Republic of Korea

‡ These authors contributed equally to this work.

E-mail: idkim@kaist.ac.kr, jongmin.yuk@kaist.ac.kr

## Supporting Figures

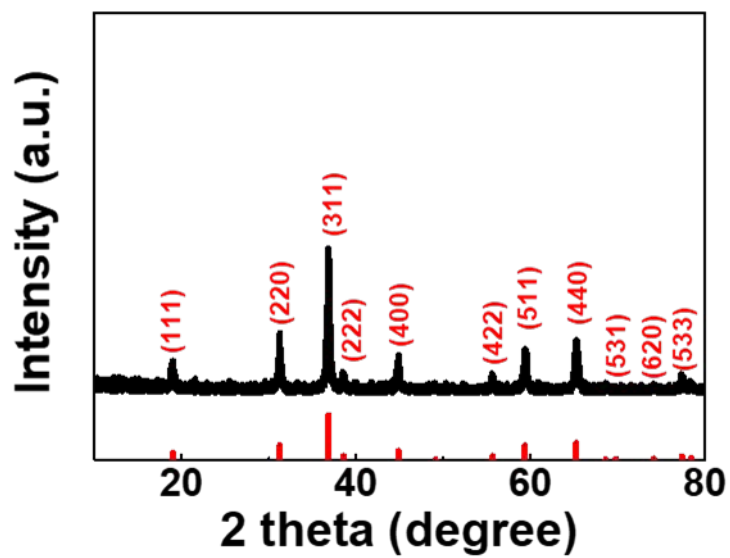

**Figure S1.** XRD pattern of pristine  $\text{Co}_3\text{O}_4$  nanoparticles. The crystal structure well matched with  $\text{Co}_3\text{O}_4$  (JCPDS #42-1467).

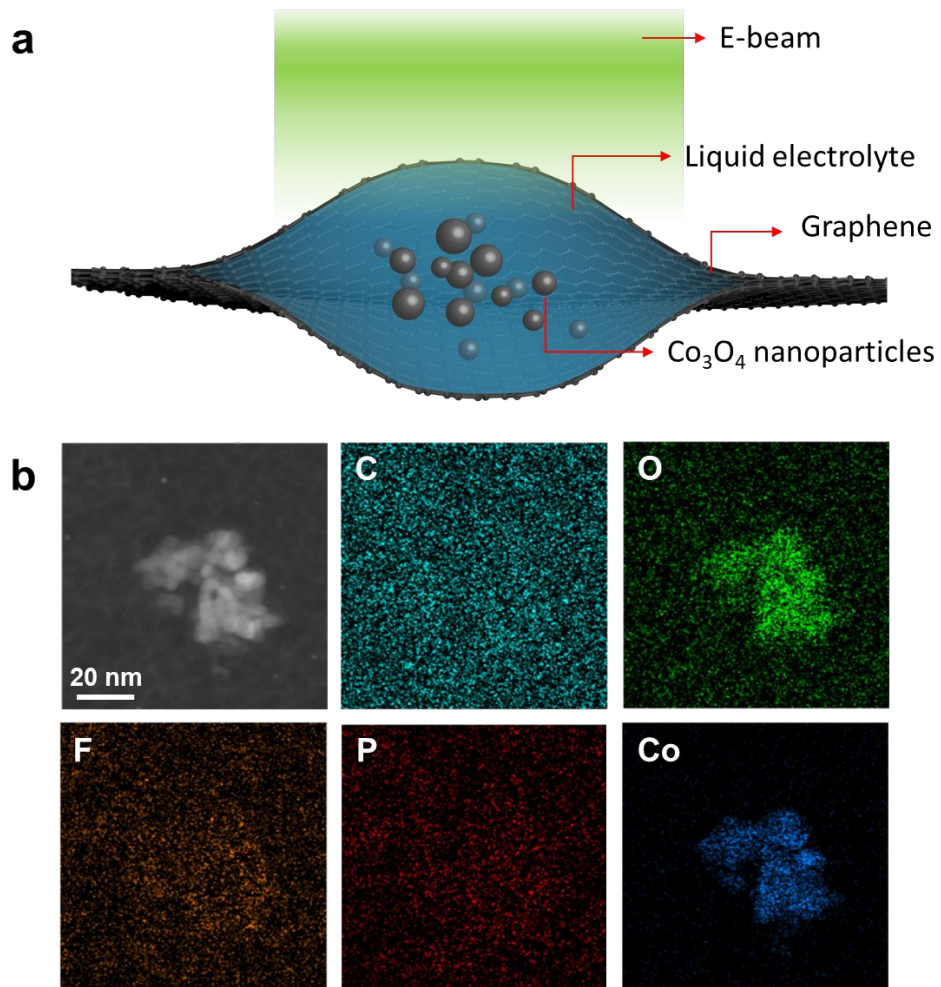

**Figure S2.** (a) Schematic diagram of GLC, consisting of two graphene sheets, liquid electrolyte, and  $\text{Co}_3\text{O}_4$  nanoparticles. (b) HAADF-STEM image of  $\text{Co}_3\text{O}_4$  nanoparticles inside the GLC and corresponding STEM-EDS mapping of C, O, F, P, and Co.

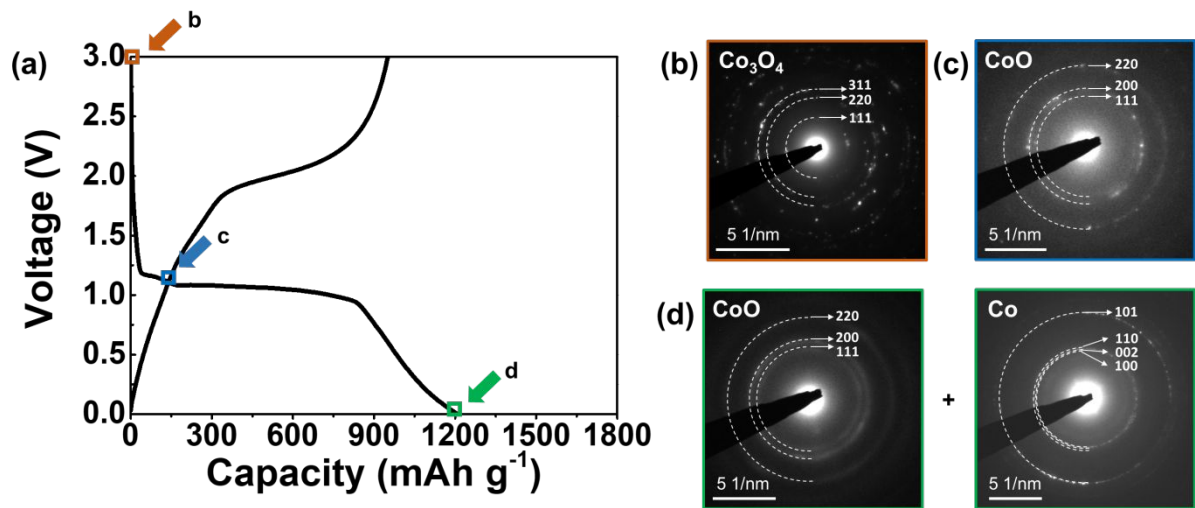

**Figure S3.** (a) Galvanostatic charge-discharge profile of 1st cycle. (b, c, d) corresponding *ex situ* SAED patterns marked as brown, blue and green arrows in (a).

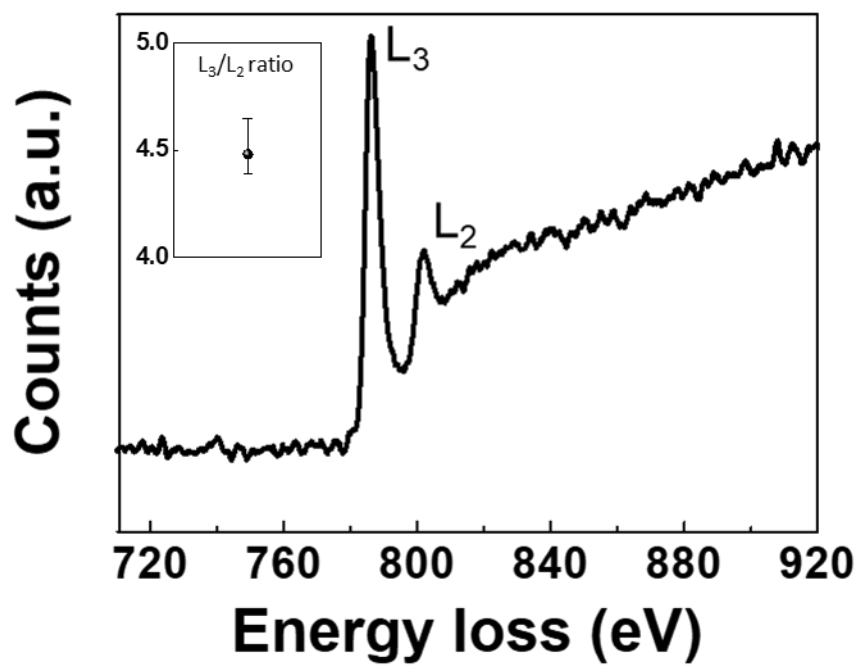

**Figure S4.** EELS spectrum of Co-L<sub>2,3</sub> edge from *ex situ* experiment, at 1.2 V in Figure S3 (inset: ratio between L<sub>3</sub>/L<sub>2</sub> peaks).

## Supporting Movie

Movie S1. Real-time TEM movie showing lithiation of  $\text{Co}_3\text{O}_4$  nanoparticles in GLC (x4 faster).
